# Supplementary material for: Agile work practices: opportunities and risks for occupational well-being
Source: Springer Nature journal article supplement (doi:10.1007/s11612-023-00712-6), 2023-10-23
Supplement: MOESM2 [file 26215044]

SUPPLEMENTAL MATERIAL

**SUPPLEMENTAL MATERIAL: Agile Work Practices: Opportunities and Risks for  
Occupational Well-being**

**Table of Contents**

Table 1: *Overview on interviewees (demographics)* .....2  
Table 2: *Interview guideline*.....3

SUPPLEMENTAL MATERIAL

Table 1: *Overview on interviewees (demographics)*

| #  | Name             | Age | Gender | Country     | Industry                    | Size     | Role              |
|----|------------------|-----|--------|-------------|-----------------------------|----------|-------------------|
| 1  | <i>Susan</i>     | 37  | Female | Germany     | E-commerce                  | Mid-size | Product Owner     |
| 2  | <i>Tim</i>       | 31  | Male   | Germany     | Learning software           | Startup  | Product Owner     |
| 3  | <i>Ann</i>       | 49  | Female | Switzerland | Financial services          | Mid-size | Product Owner     |
| 4  | <i>Alex</i>      | 45  | Male   | Germany     | Pharma                      | Large    | Frontend Engineer |
| 5  | <i>Richard</i>   | 34  | Male   | Germany     | Food industry               | Mid-size | Software Engineer |
| 6  | <i>Christian</i> | 31  | Male   | Germany     | Navigation software         | Large    | Software Engineer |
| 7  | <i>Brian</i>     | 28  | Male   | USA         | Sporting goods manufacturer | Large    | Software Engineer |
| 8  | <i>Ben</i>       | 36  | Male   | Norway      | Networking hard-/software   | Large    | Test Engineer     |
| 9  | <i>Charles</i>   | 35  | Male   | Germany     | Engineering & technology    | Large    | Agile Coach       |
| 10 | <i>Matt</i>      | 44  | Male   | Germany     | Medical engineering         | Large    | Scrum Coach       |
| 11 | <i>Laura</i>     | 27  | Female | Germany     | Insurance                   | Large    | Scrum Master      |
| 12 | <i>Emma</i>      | 32  | Female | Germany     | Information technology      | Large    | Scrum Master      |
| 13 | <i>Sebastian</i> | 32  | Male   | Germany     | Information technology      | Start-up | Scrum Master      |
| 14 | <i>Sarah</i>     | 27  | Female | Germany     | E-commerce                  | Mid-size | Scrum Master      |

Note. The names are fictitious, so the respondents remain anonymous.

## SUPPLEMENTAL MATERIAL

Table 2: *Interview guide*

---

| <b>Experience with agile work</b>                                                                                                                                                                                                                                                                                                                                                                                                                                                                                                                                                                                                                                                                                                                                                                                                                                                                                                                                     |
|-----------------------------------------------------------------------------------------------------------------------------------------------------------------------------------------------------------------------------------------------------------------------------------------------------------------------------------------------------------------------------------------------------------------------------------------------------------------------------------------------------------------------------------------------------------------------------------------------------------------------------------------------------------------------------------------------------------------------------------------------------------------------------------------------------------------------------------------------------------------------------------------------------------------------------------------------------------------------|
| <ol style="list-style-type: none"><li>1. What is your experience with agile work, especially the Scrum process? How are you doing with it?</li><li>2. Where do you see opportunities in the agile Scrum process? What works particularly well and why?</li><li>3. Where do you see risks in the agile Scrum process? What is not going so well and why?</li></ol>                                                                                                                                                                                                                                                                                                                                                                                                                                                                                                                                                                                                     |
| <b>Job demands, resources, and well-being</b>                                                                                                                                                                                                                                                                                                                                                                                                                                                                                                                                                                                                                                                                                                                                                                                                                                                                                                                         |
| <ol style="list-style-type: none"><li>1. Are there increased demands, such as role conflict, workload, time pressure, that are related to agile ways of working for you?</li><li>2. What positive job resources, such as feedback opportunities, social support, or autonomy, do you see related to the agile Scrum process?</li><li>3. How would you describe the impact on psychological well-being (stress / burnout vs. motivation / engagement) of agile ways of working? Are there any correlations here?</li><li>4. How do you make sure you're doing well in the agile process?</li></ol>                                                                                                                                                                                                                                                                                                                                                                     |
| <b>Context factors</b>                                                                                                                                                                                                                                                                                                                                                                                                                                                                                                                                                                                                                                                                                                                                                                                                                                                                                                                                                |
| <ol style="list-style-type: none"><li>1. Are there contexts that tend to hinder agile working or in which agile working particularly does not work well or fails? (Culture, leadership, structures, etc.)</li><li>2. Are there contexts that are particularly conducive to agile working or in which agile working works particularly well?</li></ol>                                                                                                                                                                                                                                                                                                                                                                                                                                                                                                                                                                                                                 |
| <b>Concrete agile practices</b>                                                                                                                                                                                                                                                                                                                                                                                                                                                                                                                                                                                                                                                                                                                                                                                                                                                                                                                                       |
| <ol style="list-style-type: none"><li>1. An important component of agile working is self-organization in the teams. How well does this work in your team? Where do you see the opportunities, where the risks?</li><li>2. How do you experience the iterative approach in sprints? Is it more conducive or a hindrance to the time-based approach?</li><li>3. What advantages and disadvantages do you see in the close involvement of the customer in the development process? How do you manage this?</li><li>4. Do you manage to achieve a "potentially shippable product increment" in every sprint? Is this goal helpful or a hindrance?</li><li>5. What impact do the Daily Scrum Meetings have on your work process?</li><li>6. How helpful or unhelpful do you find the retrospectives? Why?</li><li>7. What impact does the strong transparency and visualization of work progress in Scrum (e.g. Scrum Board and other metrics) have on everyone?</li></ol> |

---
